# Supplementary material for: Predictive Modeling of Phenotypic Antimicrobial Susceptibility of Selected Beta-Lactam Antimicrobials from Beta-Lactamase Resistance Genes
Source: MDPI journal article supplement (doi:10.3390/antibiotics13030224), 2024-02-28
Supplement: s1 [file s1]

**Supplementary Table S1: Prediction of MIC of Ceftriaxone from retail meat**

| Variables                      | Categories                         | coefficients | Predicted MIC | 95% CI        | P value |
|--------------------------------|------------------------------------|--------------|---------------|---------------|---------|
| Year                           | 2002                               | ref          |               |               |         |
|                                | 2003                               | 0.06         | 1.04          | 0.96-1.12     | 0.32    |
|                                | 2004                               | 0.11         | 1.08          | 1.01-1.16     | 0.03    |
|                                | 2005                               | 0.08         | 1.06          | 0.98-1.13     | 0.13    |
|                                | 2006                               | 0.02         | 1.01          | 0.95-1.09     | 0.67    |
|                                | 2007                               | 0.06         | 1.04          | 0.97-1.12     | 0.27    |
|                                | 2008                               | 0.01         | 1.01          | 0.94-1.08     | 0.81    |
|                                | 2009                               | 0.14         | 1.10          | 1.03-1.18     | 0.01    |
|                                | 2010                               | 0.58         | 1.49          | 1.38-1.61     | <0.01   |
|                                | 2011                               | 0.01         | 1.01          | 0.94-1.08     | 0.78    |
|                                | 2012                               | 0.00         | 1.00          | 0.93-1.07     | 0.93    |
|                                | 2013                               | 0.00         | 1.00          | 0.93-1.07     | 0.95    |
|                                | 2014                               | 0.00         | 1.00          | 0.93-1.08     | 0.93    |
|                                | 2015                               | -0.01        | 1.00          | 0.93-1.06     | 0.91    |
|                                | 2016                               | 0.03         | 1.02          | 0.96-1.10     | 0.48    |
|                                | 2017                               | 0.03         | 1.02          | 0.96-1.09     | 0.51    |
|                                | 2018                               | 0.06         | 1.04          | 0.98-1.11     | 0.19    |
| <i>bla</i> <sub>CMY-2</sub>    | (Yes)                              | 5.85         | 57.59         | 19.20-172.73  | <0.01   |
| <i>bla</i> <sub>CMY-3</sub>    | (Yes)                              | -0.22        | 0.86          | 0.50-1.47     | 0.58    |
| <i>bla</i> <sub>CTX-M-1</sub>  | (Yes)                              | 7.80         | 223.23        | 31.35-1589.55 | <0.01   |
| <i>bla</i> <sub>CTX-M-55</sub> | (Yes)                              | 7.99         | 254.64        | 1.90-34080.37 | 0.03    |
| <i>bla</i> <sub>CTX-M-65</sub> | (Yes)                              | 7.67         | 203.68        | 111.36-372.51 | <0.01   |
| <i>bla</i> <sub>SHV-2</sub>    | (Yes)                              | 4.99         | 31.79         | 1.16-870.20   | 0.04    |
| <i>bla</i> <sub>TEM-1</sub>    | (Yes)                              | 0.02         | 1.01          | 0.99-1.04     | 0.28    |
| Bacteria                       | <i>E. coli</i>                     | ref          |               |               |         |
|                                | <i>S. enterica</i>                 | 0.00         | 1.00          | 0.97-1.03     | 0.91    |
| Meat type                      | Chicken breast                     | ref          |               |               |         |
|                                | Ground Beef                        | -0.03        | 0.98          | 0.94-1.02     | 0.28    |
|                                | Ground Turkey                      | -0.03        | 0.98          | 0.96-1.00     | 0.02    |
|                                | Pork cut                           | -0.04        | 0.97          | 0.94-1.00     | 0.08    |
| Interaction                    | <i>bla</i> <sub>CMY-2</sub> × 2003 | 0.58         | 1.50          | 0.43-5.25     | 0.53    |
|                                | <i>bla</i> <sub>CMY-2</sub> × 2004 | 0.41         | 1.33          | 0.42-4.25     | 0.63    |
|                                | <i>bla</i> <sub>CMY-2</sub> × 2005 | 0.28         | 1.21          | 0.39-3.81     | 0.74    |
|                                | <i>bla</i> <sub>CMY-2</sub> × 2006 | 0.45         | 1.37          | 0.42-4.44     | 0.60    |
|                                | <i>bla</i> <sub>CMY-2</sub> × 2007 | 0.48         | 1.39          | 0.40-4.89     | 0.61    |
|                                | <i>bla</i> <sub>CMY-2</sub> × 2008 | 0.12         | 1.09          | 0.36-3.25     | 0.88    |
|                                | <i>bla</i> <sub>CMY-2</sub> × 2009 | 0.07         | 1.05          | 0.37-2.99     | 0.92    |
|                                | <i>bla</i> <sub>CMY-2</sub> × 2010 | -0.45        | 0.73          | 0.24-2.18     | 0.57    |
|                                | <i>bla</i> <sub>CMY-2</sub> × 2011 | 0.13         | 1.09          | 0.33-3.58     | 0.89    |
|                                | <i>bla</i> <sub>CMY-2</sub> × 2012 | 0.00         | 1.00          | 0.31-3.23     | 1.00    |
|                                | <i>bla</i> <sub>CMY-2</sub> × 2013 | -0.22        | 0.86          | 0.26-2.88     | 0.81    |
|                                | <i>bla</i> <sub>CMY-2</sub> × 2014 | -0.07        | 0.95          | 0.27-3.38     | 0.94    |

|  |                                    |       |      |           |      |
|--|------------------------------------|-------|------|-----------|------|
|  | <i>bla</i> <sub>CMY-2</sub> × 2015 | -0.18 | 0.88 | 0.25-3.09 | 0.84 |
|  | <i>bla</i> <sub>CMY-2</sub> × 2016 | -0.27 | 0.83 | 0.24-2.86 | 0.77 |
|  | <i>bla</i> <sub>CMY-2</sub> × 2017 | -0.30 | 0.81 | 0.23-2.84 | 0.74 |
|  | <i>bla</i> <sub>CMY-2</sub> × 2018 | -0.12 | 0.92 | 0.25-3.36 | 0.90 |

The interaction between two variables is represented by (×).

**Supplementary Table S2: Prediction of MIC of Cefoxitin from retail meat**

| Variables                      | Categories                         | coefficients | Predicted MIC | 95% CI    | P value |
|--------------------------------|------------------------------------|--------------|---------------|-----------|---------|
| Year                           | 2002                               | ref          |               |           |         |
|                                | 2003                               | -0.06        | 0.96          | 0.85-1.08 | 0.51    |
|                                | 2004                               | -0.12        | 0.92          | 0.83-1.03 | 0.16    |
|                                | 2005                               | -0.50        | 0.71          | 0.63-0.79 | <0.01   |
|                                | 2006                               | -0.09        | 0.94          | 0.84-1.05 | 0.28    |
|                                | 2007                               | -0.17        | 0.89          | 0.79-0.99 | 0.03    |
|                                | 2008                               | -0.17        | 0.89          | 0.80-0.99 | 0.03    |
|                                | 2009                               | -0.06        | 0.96          | 0.86-1.07 | 0.48    |
|                                | 2010                               | -0.02        | 0.99          | 0.89-1.10 | 0.81    |
|                                | 2011                               | -0.16        | 0.89          | 0.80-1.00 | 0.05    |
|                                | 2012                               | -0.24        | 0.85          | 0.76-0.95 | <0.01   |
|                                | 2013                               | -0.20        | 0.87          | 0.78-0.97 | 0.01    |
|                                | 2014                               | 0.02         | 1.02          | 0.91-1.14 | 0.78    |
|                                | 2015                               | 0.14         | 1.10          | 0.99-1.22 | 0.07    |
|                                | 2016                               | 0.00         | 1.00          | 0.90-1.11 | 0.95    |
|                                | 2017                               | 0.03         | 1.02          | 0.92-1.12 | 0.70    |
|                                | 2018                               | 0.00         | 1.00          | 0.91-1.10 | 1.00    |
| <i>bla</i> <sub>CMY-2</sub>    | (Yes)                              | 2.33         | 5.04          | 3.97-6.41 | <0.01   |
| <i>bla</i> <sub>CMY-3</sub>    | (Yes)                              | -0.15        | 0.90          | 0.84-0.96 | <0.01   |
| <i>bla</i> <sub>CTX-M-1</sub>  | (Yes)                              | 0.34         | 1.26          | 0.85-1.87 | 0.25    |
| <i>bla</i> <sub>CTX-M-55</sub> | (Yes)                              | 1.12         | 2.17          | 0.98-4.81 | 0.06    |
| <i>bla</i> <sub>CTX-M-65</sub> | (Yes)                              | 0.65         | 1.57          | 1.38-1.77 | <0.01   |
| <i>bla</i> <sub>SHV-2</sub>    | (Yes)                              | 0.41         | 1.33          | 0.51-3.50 | 0.56    |
| <i>bla</i> <sub>TEM-1</sub>    | (Yes)                              | 0.05         | 1.04          | 1.01-1.07 | 0.02    |
| Bacteria                       | <i>E. coli</i>                     | ref          |               |           |         |
|                                | <i>S. enterica</i>                 | -0.58        | 0.67          | 0.63-0.71 | <0.01   |
| Meat type                      | Chicken breast                     | ref          |               |           |         |
|                                | Ground Beef                        | -0.17        | 0.89          | 0.82-0.96 | <0.01   |
|                                | Ground Turkey                      | -0.01        | 0.99          | 0.93-1.06 | 0.85    |
|                                | Pork cut                           | -0.10        | 0.93          | 0.86-1.01 | 0.09    |
| Interaction                    | <i>bla</i> <sub>CMY-2</sub> × 2003 | 0.04         | 1.03          | 0.81-1.31 | 0.81    |
|                                | <i>bla</i> <sub>CMY-2</sub> × 2004 | 1.10         | 2.14          | 1.73-2.65 | <0.01   |
|                                | <i>bla</i> <sub>CMY-2</sub> × 2005 | 1.28         | 2.42          | 1.95-3.01 | <0.01   |
|                                | <i>bla</i> <sub>CMY-2</sub> × 2006 | 1.04         | 2.06          | 1.66-2.55 | <0.01   |
|                                | <i>bla</i> <sub>CMY-2</sub> × 2007 | 0.95         | 1.93          | 1.54-2.41 | <0.01   |
|                                | <i>bla</i> <sub>CMY-2</sub> × 2008 | 0.91         | 1.88          | 1.53-2.32 | <0.01   |

|  |                                                  |       |      |           |       |
|--|--------------------------------------------------|-------|------|-----------|-------|
|  | <i>bla</i> <sub>CMY-2</sub> × 2009               | 0.83  | 1.77 | 1.44-2.18 | <0.01 |
|  | <i>bla</i> <sub>CMY-2</sub> × 2010               | 0.83  | 1.78 | 1.44-2.20 | <0.01 |
|  | <i>bla</i> <sub>CMY-2</sub> × 2011               | 0.82  | 1.77 | 1.42-2.20 | <0.01 |
|  | <i>bla</i> <sub>CMY-2</sub> × 2012               | 0.90  | 1.86 | 1.49-2.31 | <0.01 |
|  | <i>bla</i> <sub>CMY-2</sub> × 2013               | 0.94  | 1.92 | 1.54-2.39 | <0.01 |
|  | <i>bla</i> <sub>CMY-2</sub> × 2014               | 0.72  | 1.65 | 1.32-2.07 | <0.01 |
|  | <i>bla</i> <sub>CMY-2</sub> × 2015               | 0.63  | 1.55 | 1.24-1.93 | <0.01 |
|  | <i>bla</i> <sub>CMY-2</sub> × 2016               | 0.83  | 1.77 | 1.42-2.21 | <0.01 |
|  | <i>bla</i> <sub>CMY-2</sub> × 2017               | 0.75  | 1.68 | 1.34-2.10 | <0.01 |
|  | <i>bla</i> <sub>CMY-2</sub> × 2018               | 0.70  | 1.62 | 1.29-2.04 | <0.01 |
|  | <i>bla</i> <sub>CMY-2</sub> × <i>S. enterica</i> | 0.42  | 1.34 | 1.18-1.52 | <0.01 |
|  | <i>bla</i> <sub>CMY-2</sub> × Ground beef        | -0.21 | 0.86 | 0.76-0.98 | 0.03  |
|  | <i>bla</i> <sub>CMY-2</sub> × Ground turkey      | -0.14 | 0.91 | 0.86-0.96 | <0.01 |
|  | <i>bla</i> <sub>CMY-2</sub> × Pork cut           | -0.42 | 0.75 | 0.63-0.88 | <0.01 |
|  | <i>S. enterica</i> × Ground beef                 | 0.42  | 1.34 | 1.19-1.50 | <0.01 |
|  | <i>S. enterica</i> × Ground turkey               | 0.18  | 1.13 | 1.06-1.22 | <0.01 |
|  | <i>S. enterica</i> × Pork cut                    | 0.42  | 1.33 | 1.20-1.48 | <0.01 |
|  |                                                  |       |      |           |       |

The interaction between two variables is represented by (×).

**Supplementary Table S3: Prediction of MIC of Ceftiofur from retail meat**

| Variables                      | Categories     | coefficients | Predicted MIC | 95% CI      | P value |
|--------------------------------|----------------|--------------|---------------|-------------|---------|
| Year                           | 2002           | ref          |               |             |         |
|                                | 2003           | 0.16         | 1.12          | 0.98-1.27   | 0.10    |
|                                | 2004           | 0.17         | 1.13          | 1.00-1.27   | 0.05    |
|                                | 2005           | 0.08         | 1.05          | 0.94-1.19   | 0.38    |
|                                | 2006           | 0.56         | 1.47          | 1.31-1.65   | <0.01   |
|                                | 2007           | 0.51         | 1.43          | 1.27-1.60   | <0.01   |
|                                | 2008           | 0.57         | 1.49          | 1.33-1.66   | <0.01   |
|                                | 2009           | 0.56         | 1.47          | 1.31-1.65   | <0.01   |
|                                | 2010           | 0.67         | 1.59          | 1.42-1.78   | <0.01   |
|                                | 2011           | 0.43         | 1.35          | 1.20-1.52   | <0.01   |
|                                | 2012           | 0.25         | 1.19          | 1.05-1.34   | <0.01   |
|                                | 2013           | 0.40         | 1.32          | 1.17-1.48   | <0.01   |
|                                | 2014           | 0.54         | 1.45          | 1.29-1.64   | <0.01   |
|                                | 2015           | 0.49         | 1.40          | 1.26-1.57   | <0.01   |
| <i>bla</i> <sub>CMY-2</sub>    | (Yes)          | 3.85         | 14.46         | 12.76-16.39 | <0.01   |
| <i>bla</i> <sub>CMY-3</sub>    | (Yes)          | -0.09        | 0.94          | 0.91-0.97   | <0.01   |
| <i>bla</i> <sub>CTX-M-1</sub>  | (Yes)          | 3.14         | 8.82          | 7.36-10.57  | <0.01   |
| <i>bla</i> <sub>CTX-M-65</sub> | (Yes)          | 3.19         | 9.11          | 7.04-11.79  | <0.01   |
| <i>bla</i> <sub>SHV-2</sub>    | (Yes)          | 3.03         | 8.18          | 6.28-10.67  | <0.01   |
| <i>bla</i> <sub>TEM-1</sub>    | (Yes)          | 0.06         | 1.04          | 1.02-1.07   | <0.01   |
| Bacteria                       | <i>E. coli</i> | ref          |               |             |         |

|             |                                                |       |      |           |       |
|-------------|------------------------------------------------|-------|------|-----------|-------|
|             | <i>S. enterica</i>                             | 1.19  | 2.28 | 1.18-4.40 | 0.01  |
| Meat type   | Chicken breast                                 | ref   |      |           |       |
|             | Ground Beef                                    | 0.14  | 1.10 | 1.06-1.14 | 0.01  |
|             | Ground Turkey                                  | 0.16  | 1.11 | 1.02-1.22 | <0.01 |
|             | Pork cut                                       | 0.20  | 1.15 | 1.07-1.24 | <0.01 |
| Interaction | <i>bla</i> <sub>CMY-2</sub> × 2003             | -0.20 | 0.87 | 0.75-1.02 | 0.08  |
|             | <i>bla</i> <sub>CMY-2</sub> × 2004             | -0.22 | 0.86 | 0.74-0.99 | 0.04  |
|             | <i>bla</i> <sub>CMY-2</sub> × 2005             | -0.28 | 0.82 | 0.71-0.95 | 0.01  |
|             | <i>bla</i> <sub>CMY-2</sub> × 2006             | -0.61 | 0.65 | 0.57-0.75 | <0.01 |
|             | <i>bla</i> <sub>CMY-2</sub> × 2007             | -0.67 | 0.63 | 0.54-0.73 | <0.01 |
|             | <i>bla</i> <sub>CMY-2</sub> × 2008             | -0.76 | 0.59 | 0.52-0.67 | <0.01 |
|             | <i>bla</i> <sub>CMY-2</sub> × 2009             | -0.70 | 0.62 | 0.54-0.70 | <0.01 |
|             | <i>bla</i> <sub>CMY-2</sub> × 2010             | -0.77 | 0.58 | 0.51-0.67 | <0.01 |
|             | <i>bla</i> <sub>CMY-2</sub> × 2011             | -0.58 | 0.67 | 0.58-0.77 | <0.01 |
|             | <i>bla</i> <sub>CMY-2</sub> × 2012             | -0.40 | 0.76 | 0.66-0.87 | <0.01 |
|             | <i>bla</i> <sub>CMY-2</sub> × 2013             | -0.54 | 0.69 | 0.60-0.79 | <0.01 |
|             | <i>bla</i> <sub>CMY-2</sub> × 2014             | -0.68 | 0.62 | 0.54-0.72 | <0.01 |
|             | <i>bla</i> <sub>CMY-2</sub> × 2015             | -0.64 | 0.64 | 0.56-0.74 | <0.01 |
|             | <i>bla</i> <sub>CMY-2</sub> × Ground beef      | -0.17 | 0.89 | 0.85-0.93 | 0.01  |
|             | <i>bla</i> <sub>CMY-2</sub> ×<br>Ground turkey | -0.21 | 0.86 | 0.78-0.96 | <0.01 |
|             | <i>bla</i> <sub>CMY-2</sub> × Pork cut         | -0.59 | 0.67 | 0.56-0.79 | <0.01 |

The interaction between two variables is represented by (×).
